# Supplementary material
Source: Springer Nature journal article supplement (https://www.springermedizin.de/resource/supplementary/12936_2007_431_MOESM6_ESM.pdf/9547436)

- Sleeping -Indoor
- Not sleeping -Indoor
- Sleeping or not sleeping - Outdoor

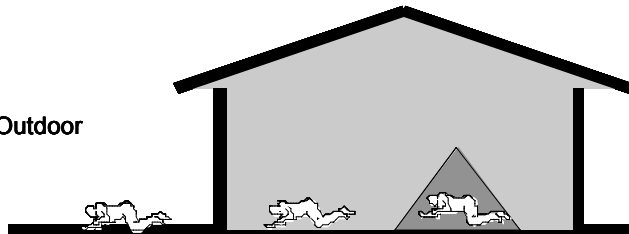

**PROPORTION PEOPLE PRESENT**

OVERALL

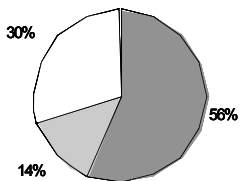

UNSCREENED

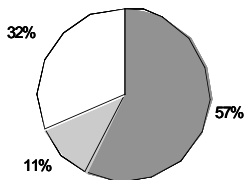

SCREENED

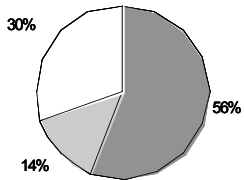

NO CEILING

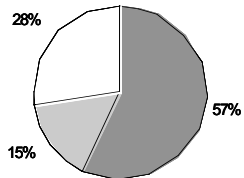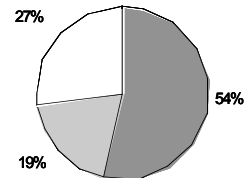

CEILING

**PROPORTION OF EXPOSURE**

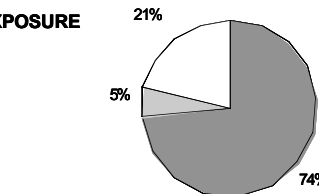

UNSCREENED

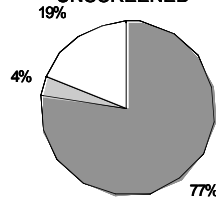

SCREENED

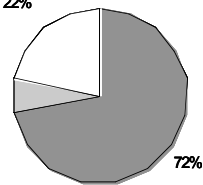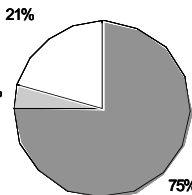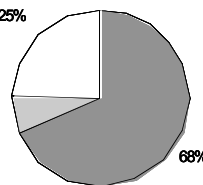

Supplement: MOESM6 [file 9547436]
